# Supplementary material for: A Deep-Learning Approach toward Rational Molecular Docking Protocol Selection
Source: PubMed Central journal article supplement (PMC7321124; doi:10.3390/molecules25112487), 2020-05-27
Supplement: molecules-25-02487-s001.pdf [file molecules-25-02487-s001.pdf]

# A deep-learning approach toward rational molecular docking protocol selection.

## Supplementary information

José Jiménez-Luna,<sup>\*,†,‡,§</sup> Alberto Cuzzolin,<sup>¶,§</sup> Giovanni Bolcato,<sup>¶</sup> Mattia  
Sturlese,<sup>¶</sup> and Stefano Moro<sup>\*,¶</sup>

<sup>†</sup>*Department of Chemistry and Applied Biosciences, RETHINK, ETH Zürich, Switzerland.*

<sup>‡</sup>*Institute for Pure & Applied Mathematics, University California Los Angeles, 460 Portola  
Plaza, 90095-7121 Los Angeles, CA*

<sup>¶</sup>*Molecular Modeling Section, Department of Pharmaceutical and Pharmacological  
Sciences, University of Padova, 35131 Padova, Italy*

<sup>§</sup>*Equal contribution*

E-mail: jose.jimenez@rethink.ethz.ch; stefano.moro@unipd.it

## List of Tables

|   |                                                                                                                                                  |   |
|---|--------------------------------------------------------------------------------------------------------------------------------------------------|---|
| 1 | Predictive performance for $\text{RMSD}_{\min}$ ( $\pm 1$ std.) per docking protocol, for each of the four splits considered. . . . .            | 3 |
| 2 | Predictive performance for nRMSD ( $\pm 1$ std.) per docking protocol, for each of the four splits considered. . . . .                           | 3 |
| 3 | Ligand-centric evaluation for the $\text{RMSD}_{\min}$ ( $\pm 1$ std.) metric and the four different proposed split types in this study. . . . . | 3 |

|   |                                                                                                                                     |   |
|---|-------------------------------------------------------------------------------------------------------------------------------------|---|
| 4 | Ligand-centric evaluation for the $n$ RMSD( $\pm 1$ std.) metric and the four different proposed split types in this study. . . . . | 4 |
|---|-------------------------------------------------------------------------------------------------------------------------------------|---|

## List of Figures

|   |                                                                                                                                                                         |   |
|---|-------------------------------------------------------------------------------------------------------------------------------------------------------------------------|---|
| 1 | Average RMSE for the $\text{RMSD}_{\text{ave}}$ metric for all types of splits disaggregated into the 30 most populated PFAM families in the PDBbind refined dataset. . | 4 |
|---|-------------------------------------------------------------------------------------------------------------------------------------------------------------------------|---|

Table 1: Predictive performance for  $\text{RMSD}_{\min}$  ( $\pm 1$  std.) per docking protocol, for each of the four splits considered.

| Protocol       | RMSE                | Pearson's $R$       | RMSE                | Pearson's $R$        | RMSE                | Pearson's $R$       | RMSE                     | Pearson's $R$       |
|----------------|---------------------|---------------------|---------------------|----------------------|---------------------|---------------------|--------------------------|---------------------|
|                | random              |                     | ligand scaffold     |                      | protein classes     |                     | protein classes balanced |                     |
| autodock-ga    | 1.74 ( $\pm 0.06$ ) | 0.51 ( $\pm 0.03$ ) | 1.85 ( $\pm 0.24$ ) | 0.35 ( $\pm 0.03$ )  | 1.81 ( $\pm 0.18$ ) | 0.44 ( $\pm 0.06$ ) | 1.64 ( $\pm 0.04$ )      | 0.59 ( $\pm 0.03$ ) |
| autodock-lga   | 2.05 ( $\pm 0.06$ ) | 0.45 ( $\pm 0.04$ ) | 2.05 ( $\pm 0.43$ ) | 0.25 ( $\pm 0.14$ )  | 2.17 ( $\pm 0.13$ ) | 0.35 ( $\pm 0.07$ ) | 1.92 ( $\pm 0.05$ )      | 0.54 ( $\pm 0.04$ ) |
| autodock-ls    | 2.37 ( $\pm 0.07$ ) | 0.27 ( $\pm 0.03$ ) | 2.22 ( $\pm 0.16$ ) | 0.20 ( $\pm 0.19$ )  | 2.24 ( $\pm 0.13$ ) | 0.37 ( $\pm 0.05$ ) | 2.29 ( $\pm 0.03$ )      | 0.37 ( $\pm 0.03$ ) |
| glide-sp       | 2.32 ( $\pm 0.08$ ) | 0.42 ( $\pm 0.01$ ) | 2.34 ( $\pm 0.69$ ) | 0.23 ( $\pm 0.13$ )  | 2.34 ( $\pm 0.17$ ) | 0.37 ( $\pm 0.06$ ) | 2.06 ( $\pm 0.18$ )      | 0.52 ( $\pm 0.06$ ) |
| gold-asp       | 1.97 ( $\pm 0.15$ ) | 0.45 ( $\pm 0.05$ ) | 1.82 ( $\pm 0.94$ ) | 0.21 ( $\pm 0.12$ )  | 1.99 ( $\pm 0.14$ ) | 0.45 ( $\pm 0.06$ ) | 1.81 ( $\pm 0.10$ )      | 0.59 ( $\pm 0.04$ ) |
| gold-chemscore | 2.35 ( $\pm 0.12$ ) | 0.40 ( $\pm 0.05$ ) | 2.18 ( $\pm 0.89$ ) | 0.20 ( $\pm 0.14$ )  | 2.27 ( $\pm 0.14$ ) | 0.46 ( $\pm 0.08$ ) | 2.12 ( $\pm 0.12$ )      | 0.56 ( $\pm 0.04$ ) |
| gold-goldscore | 1.98 ( $\pm 0.15$ ) | 0.32 ( $\pm 0.04$ ) | 1.70 ( $\pm 0.70$ ) | -0.04 ( $\pm 0.48$ ) | 1.94 ( $\pm 0.21$ ) | 0.35 ( $\pm 0.09$ ) | 1.74 ( $\pm 0.11$ )      | 0.59 ( $\pm 0.21$ ) |
| gold-plp       | 2.03 ( $\pm 0.18$ ) | 0.47 ( $\pm 0.06$ ) | 1.89 ( $\pm 0.96$ ) | 0.22 ( $\pm 0.15$ )  | 2.05 ( $\pm 0.20$ ) | 0.45 ( $\pm 0.08$ ) | 1.89 ( $\pm 0.04$ )      | 0.58 ( $\pm 0.02$ ) |
| plants-chemplp | 1.78 ( $\pm 0.17$ ) | 0.41 ( $\pm 0.05$ ) | 1.58 ( $\pm 0.72$ ) | 0.36 ( $\pm 0.34$ )  | 1.72 ( $\pm 0.23$ ) | 0.45 ( $\pm 0.03$ ) | 1.54 ( $\pm 0.12$ )      | 0.55 ( $\pm 0.04$ ) |
| plants-plp95   | 2.35 ( $\pm 0.11$ ) | 0.41 ( $\pm 0.03$ ) | 2.14 ( $\pm 1.08$ ) | 0.12 ( $\pm 0.07$ )  | 2.34 ( $\pm 0.30$ ) | 0.38 ( $\pm 0.05$ ) | 2.01 ( $\pm 0.26$ )      | 0.52 ( $\pm 0.05$ ) |
| plants-plp     | 2.18 ( $\pm 0.12$ ) | 0.39 ( $\pm 0.03$ ) | 1.90 ( $\pm 0.93$ ) | 0.15 ( $\pm 0.08$ )  | 2.06 ( $\pm 0.21$ ) | 0.45 ( $\pm 0.02$ ) | 1.87 ( $\pm 0.10$ )      | 0.50 ( $\pm 0.03$ ) |
| rdock-solv     | 4.34 ( $\pm 0.25$ ) | 0.36 ( $\pm 0.05$ ) | 4.54 ( $\pm 0.51$ ) | 0.13 ( $\pm 0.09$ )  | 4.16 ( $\pm 0.52$ ) | 0.38 ( $\pm 0.08$ ) | 3.61 ( $\pm 0.26$ )      | 0.55 ( $\pm 0.02$ ) |
| rdock-std      | 4.28 ( $\pm 0.10$ ) | 0.36 ( $\pm 0.03$ ) | 4.42 ( $\pm 0.65$ ) | 0.12 ( $\pm 0.08$ )  | 4.06 ( $\pm 0.49$ ) | 0.40 ( $\pm 0.08$ ) | 3.54 ( $\pm 0.18$ )      | 0.56 ( $\pm 0.01$ ) |
| vina-std       | 2.08 ( $\pm 0.12$ ) | 0.27 ( $\pm 0.04$ ) | 2.40 ( $\pm 0.27$ ) | 0.05 ( $\pm 0.08$ )  | 2.11 ( $\pm 0.15$ ) | 0.28 ( $\pm 0.11$ ) | 1.92 ( $\pm 0.05$ )      | 0.37 ( $\pm 0.03$ ) |
| <b>Average</b> | 2.41 ( $\pm 0.12$ ) | 0.39 ( $\pm 0.04$ ) | 2.36 ( $\pm 0.66$ ) | 0.18 ( $\pm 0.15$ )  | 2.38 ( $\pm 0.23$ ) | 0.40 ( $\pm 0.07$ ) | 2.14 ( $\pm 0.12$ )      | 0.53 ( $\pm 0.05$ ) |

Table 2: Predictive performance for nRMSD ( $\pm 1$  std.) per docking protocol, for each of the four splits considered.

| Protocol       | RMSE                | Pearson's $R$       | RMSE                | Pearson's $R$       | RMSE                | Pearson's $R$       | RMSE                     | Pearson's $R$       |
|----------------|---------------------|---------------------|---------------------|---------------------|---------------------|---------------------|--------------------------|---------------------|
|                | random              |                     | ligand scaffold     |                     | protein classes     |                     | protein classes balanced |                     |
| autodock-ga    | 5.06 ( $\pm 0.43$ ) | 0.53 ( $\pm 0.04$ ) | 4.74 ( $\pm 1.54$ ) | 0.45 ( $\pm 0.3$ )  | 5.18 ( $\pm 0.21$ ) | 0.48 ( $\pm 0.06$ ) | 4.75 ( $\pm 0.2$ )       | 0.63 ( $\pm 0.03$ ) |
| autodock-lga   | 6.87 ( $\pm 0.26$ ) | 0.52 ( $\pm 0.03$ ) | 5.62 ( $\pm 2.92$ ) | 0.23 ( $\pm 0.15$ ) | 7.23 ( $\pm 0.37$ ) | 0.45 ( $\pm 0.04$ ) | 6.65 ( $\pm 0.35$ )      | 0.59 ( $\pm 0.04$ ) |
| autodock-ls    | 3.43 ( $\pm 0.27$ ) | 0.15 ( $\pm 0.13$ ) | 2.85 ( $\pm 0.92$ ) | 0.26 ( $\pm 0.37$ ) | 3.32 ( $\pm 0.35$ ) | 0.25 ( $\pm 0.14$ ) | 3.21 ( $\pm 0.15$ )      | 0.29 ( $\pm 0.06$ ) |
| glide-sp       | 4.16 ( $\pm 0.1$ )  | 0.43 ( $\pm 0.02$ ) | 5.02 ( $\pm 1.39$ ) | 0.22 ( $\pm 0.14$ ) | 4.29 ( $\pm 0.38$ ) | 0.41 ( $\pm 0.07$ ) | 3.49 ( $\pm 0.16$ )      | 0.58 ( $\pm 0.03$ ) |
| gold-asp       | 6.85 ( $\pm 0.11$ ) | 0.56 ( $\pm 0.02$ ) | 7.72 ( $\pm 0.39$ ) | 0.3 ( $\pm 0.17$ )  | 7.03 ( $\pm 0.47$ ) | 0.52 ( $\pm 0.06$ ) | 5.95 ( $\pm 0.09$ )      | 0.68 ( $\pm 0.01$ ) |
| gold-chemscore | 6.78 ( $\pm 0.1$ )  | 0.54 ( $\pm 0.02$ ) | 7.48 ( $\pm 0.89$ ) | 0.28 ( $\pm 0.15$ ) | 7.04 ( $\pm 0.37$ ) | 0.49 ( $\pm 0.03$ ) | 5.86 ( $\pm 0.13$ )      | 0.67 ( $\pm 0.02$ ) |
| gold-goldscore | 7.45 ( $\pm 0.19$ ) | 0.53 ( $\pm 0.02$ ) | 8.81 ( $\pm 0.77$ ) | 0.39 ( $\pm 0.31$ ) | 7.57 ( $\pm 0.33$ ) | 0.5 ( $\pm 0.05$ )  | 6.39 ( $\pm 0.2$ )       | 0.66 ( $\pm 0.02$ ) |
| gold-plp       | 6.78 ( $\pm 0.09$ ) | 0.57 ( $\pm 0.01$ ) | 7.12 ( $\pm 0.9$ )  | 0.32 ( $\pm 0.18$ ) | 7.02 ( $\pm 0.51$ ) | 0.52 ( $\pm 0.06$ ) | 5.78 ( $\pm 0.17$ )      | 0.7 ( $\pm 0.02$ )  |
| plants-chemplp | 5.5 ( $\pm 0.12$ )  | 0.48 ( $\pm 0.01$ ) | 5.39 ( $\pm 1.75$ ) | 0.15 ( $\pm 0.09$ ) | 5.44 ( $\pm 0.31$ ) | 0.48 ( $\pm 0.06$ ) | 4.84 ( $\pm 0.09$ )      | 0.63 ( $\pm 0.02$ ) |
| plants-plp95   | 4.91 ( $\pm 0.09$ ) | 0.48 ( $\pm 0.02$ ) | 6.03 ( $\pm 0.29$ ) | 0.09 ( $\pm 0.1$ )  | 5.08 ( $\pm 0.14$ ) | 0.47 ( $\pm 0.06$ ) | 4.39 ( $\pm 0.09$ )      | 0.63 ( $\pm 0.02$ ) |
| plants-plp     | 5.07 ( $\pm 0.15$ ) | 0.47 ( $\pm 0.02$ ) | 6.05 ( $\pm 0.6$ )  | 0.12 ( $\pm 0.09$ ) | 5.11 ( $\pm 0.22$ ) | 0.48 ( $\pm 0.06$ ) | 4.52 ( $\pm 0.08$ )      | 0.63 ( $\pm 0.01$ ) |
| rdock-solv     | 4.94 ( $\pm 0.17$ ) | 0.42 ( $\pm 0.03$ ) | 4.95 ( $\pm 0.93$ ) | 0.17 ( $\pm 0.09$ ) | 4.76 ( $\pm 0.33$ ) | 0.45 ( $\pm 0.07$ ) | 4.36 ( $\pm 0.23$ )      | 0.59 ( $\pm 0.02$ ) |
| rdock-std      | 4.81 ( $\pm 0.15$ ) | 0.43 ( $\pm 0.03$ ) | 4.36 ( $\pm 1.57$ ) | 0.17 ( $\pm 0.09$ ) | 4.71 ( $\pm 0.38$ ) | 0.44 ( $\pm 0.08$ ) | 4.33 ( $\pm 0.19$ )      | 0.59 ( $\pm 0.03$ ) |
| vina-std       | 0.94 ( $\pm 0.04$ ) | 0.1 ( $\pm 0.04$ )  | 0.89 ( $\pm 0.08$ ) | 0.64 ( $\pm 0.44$ ) | 0.94 ( $\pm 0.07$ ) | 0.15 ( $\pm 0.01$ ) | 0.9 ( $\pm 0.06$ )       | 0.31 ( $\pm 0.35$ ) |
| <b>Average</b> | 5.25 ( $\pm 0.16$ ) | 0.44 ( $\pm 0.03$ ) | 5.5 ( $\pm 1.07$ )  | 0.27 ( $\pm 0.19$ ) | 5.34 ( $\pm 0.32$ ) | 0.44 ( $\pm 0.06$ ) | 4.67 ( $\pm 0.16$ )      | 0.58 ( $\pm 0.05$ ) |

Table 3: Ligand-centric evaluation for the  $\text{RMSD}_{\min}$  ( $\pm 1$  std.) metric and the four different proposed split types in this study.

| Split type               | Pearson's $R$       | RMSE                |
|--------------------------|---------------------|---------------------|
| random                   | 0.45 ( $\pm 0.01$ ) | 2.20 ( $\pm 0.06$ ) |
| ligand scaffold          | 0.49 ( $\pm 0.2$ )  | 2.19 ( $\pm 0.63$ ) |
| protein classes          | 0.48 ( $\pm 0.03$ ) | 2.03 ( $\pm 0.19$ ) |
| protein classes balanced | 0.54 ( $\pm 0.01$ ) | 1.82 ( $\pm 0.07$ ) |

Table 4: Ligand-centric evaluation for the  $n$ RMSD( $\pm 1$  std.) metric and the four different proposed split types in this study.

| Split type               | Pearson's $R$       | RMSE                |
|--------------------------|---------------------|---------------------|
| random                   | 0.55 ( $\pm 0.01$ ) | 4.88 ( $\pm 0.09$ ) |
| ligand scaffold          | 0.57 ( $\pm 0.15$ ) | 5.77 ( $\pm 0.6$ )  |
| protein classes          | 0.57 ( $\pm 0.04$ ) | 4.74 ( $\pm 0.26$ ) |
| protein classes balanced | 0.62 ( $\pm 0.01$ ) | 4.09 ( $\pm 0.06$ ) |

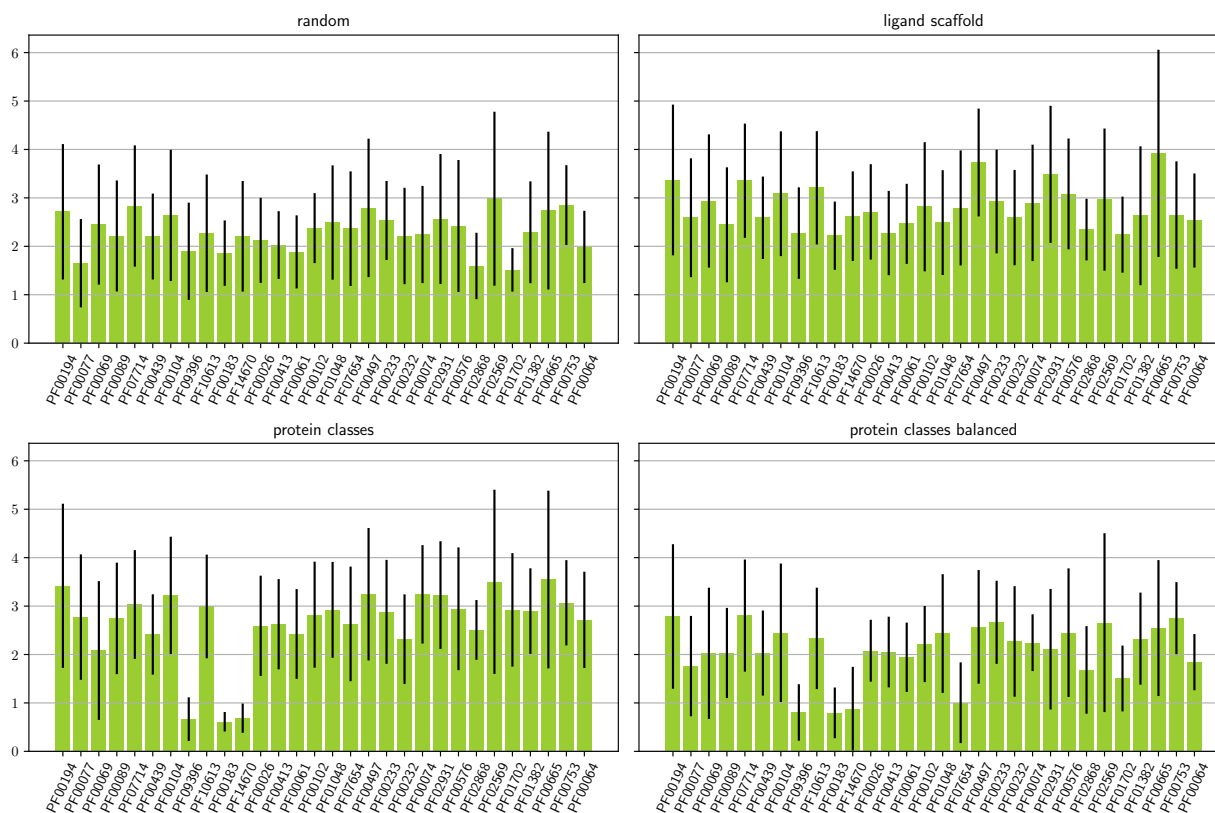

Figure 1: Average RMSE for the  $\text{RMSD}_{\text{ave}}$  metric for all types of splits disaggregated into the 30 most populated PFAM families in the PDBbind refined dataset.
